# Supplementary material
Source: publisher figshare collection journal article supplement (https://acs.figshare.com/ndownloader/files/9792586)
Supplement: Supplementary file 1 [file 9792586]

## Sheet: Supplementary Table 2
Strains		m (1/h)			rP (gETOH/gDCW/h)			rG (gGLC/gDCW/h)			Ethanol yield (gETOH/gGLC)			Max OD			Max ethanol (g/L)			Max Pyruvate (g/L)			Max Formate (g/L)
TCS083 PDCZm	EcDL129	0.1021	±	0.0059	0.4819	±	0.0368	2.2981	±	0.1156	0.468	±	0.0107	1.1042	±	0.0175	4.5326	±	0.0617	n.a.			0.0613	±	0.0038
TCS083 PDCSc1	EcDL130	0.0427	±	0.0021	0.1694	±	0.0099	0.7745	±	0.0425	0.2112	±	0.0053	0.2598	±	0.0039	0.8952	±	0.056	n.a.			0.843	±	0.0511
TCS083 PDCSc5	EcDL131	0.0377	±	0.0009	0.1633	±	0.0077	0.7519	±	0.0254	0.2094	±	0.0068	0.5082	±	0.0597	0.9114	±	0.0197	n.a.			0.7757	±	0.0383
TCS083 PDCSc6	EcDL132	0.0422	±	0.0017	0.1638	±	0.0106	0.7295	±	0.0022	0.2243	±	0.0112	0.5935	±	0.0276	1.0034	±	0.0148	n.a.			0.7921	±	0.031
TCS083 PDCPpa	EcDL133	0.0403	±	0.0008	0.206	±	0.0113	0.8282	±	0.0117	0.2505	±	0.0072	0.5541	±	0.0113	1.2942	±	0.0118	n.a.			0.7756	±	0.0185
TCS083 PDCYli	EcDL134	0.0498	±	0.0011	0.2802	±	0.0199	0.9917	±	0.0538	0.2885	±	0.0063	0.6195	±	0.0136	1.8347	±	0.0468	n.a.			0.7659	±	0.0358
TCS083* PDCZm	EcDL129*	0.235023	±	0.0113451	1.54405	±	0.108423	3.5367	±	0.224133	0.437602	±	0.00644793	1.37267	±	0.0331595	4.2616	±	0.0574501	0.00780428	±	0.000467122	0.56284	±	0.00322099
TCS083* PDCSc1	EcDL130*	0.202335	±	0.0235592	0.609806	±	0.0324185	2.9471	±	0.249771	0.208152	±	0.0120311	0.662333	±	0.0130724	1.01232	±	0.0252241	2.05493	±	0.0244261	0.844866	±	0.00599035
TCS083* PDCSc5	EcDL131*	0.188573	±	0.0121548	0.57643	±	0.0198723	2.68591	±	0.179673	0.214201	±	0.010011	0.654	±	0.658333	1.00296	±	0.0278482	2.02432	±	0.038491	0.832439	±	0.0105268
TCS083* PDCSc6	EcDL132*	0.174561	±	0.0175897	0.524758	±	0.0402963	2.41192	±	0.194049	0.216576	±	0.00889417	0.678	±	0.00571548	0.996889	±	0.0366659	2.08483	±	0.0123488	0.837033	±	0.0108844
TCS083* PDCPpa	EcDL133*	0.0867611	±	0.00681232	0.308039	±	0.0367595	1.46911	±	0.117465	0.208345	±	0.0156614	0.533667	±	0.00449691	0.852845	±	0.0090882	1.81418	±	0.0175899	0.746161	±	0.00616322
TCS083* PDCYli	EcDL134*	0.213131	±	0.0108558	0.757136	±	0.0355983	3.26044	±	0.137779	0.234021	±	0.0071949	0.661667	±	0.00601849	1.18222	±	0.00812833	2.00519	±	0.0200061	0.84148	±	0.0105057
TCS083 PDCSc1* (d12)	EcDL130e12	0.189465	±	0.00182775	0.427462	±	0.0269134	2.672	±	0.058	0.1355	±	0.005	0.6665	±	0.0025	0.576015	±	0.070106	2.38675	±	0.033822	0.863969	±	0.00746011
TCS083 PDCSc5* (d12)	EcDL131e12	0.168369	±	0.00252942	0.334301	±	0.00577148	2.3335	±	0.0728	0.1414	±	0.003	0.6705	±	0.0115	0.658672	±	0.118487	n.a.			0.899827	±	0.0300957
TCS083 PDCSc6* (d12)	EcDL132e12	0.248055	±	0.00337114	0.288823	±	0.0181586	3.7302	±	0.1277	0.1421	±	0.0094	0.693	±	0.004	0.739305	±	0.032135	n.a.			0.909643	±	0.0030822
TCS083 PDCPpa* (d12)	EcDL133e12	0.168623	±	0.00671818	0.380353	±	0.0108347	1.7776	±	0.1768	0.147	±	0.0111	0.666	±	0.045	0.675471	±	0.00914786	n.a.			0.826669	±	0.027573
TCS083 PDCYli* (d12)	EcDL134e12	0.177733	±	0.0101062	0.410969	±	0.0341884	2.3456	±	0.1536	0.163	±	0.0155	0.7915	±	0.0485	0.971958	±	0.113661	n.a.			0.854512	±	0.00070184
TCS083 PDCSc1* (d20)	EcDL130e20	0.198135	±	0.0128841	0.464438	±	0.0406955	2.7892	±	0.0432	0.1766	±	0.006	0.6445	±	0.0095	0.794075	±	0.0711244	2.09471	±	0.0285669	0.881787	±	0.00926861
TCS083 PDCSc5* (d20)	EcDL131e20	0.212885	±	0.00253165	0.375636	±	0.0213297	3.5824	±	0.1838	0.1595	±	0.0128	0.632	±	0.03	0.94639	±	0.00760726	2.08276	±	0.0117771	0.919799	±	0.0110192
TCS083 PDCSc6* (d20)	EcDL132e20	0.229601	±	0.00354163	0.47885	±	0.096028	3.6191	±	0.3045	0.144	±	0.0398	0.662	±	0.003	0.831498	±	0.120785	1.80645	±	0.332078	0.747896	±	0.124692
TCS083 PDCPpa* (d20)	EcDL133e20	0.225688	±	0.0151583	0.580645	±	0.0658328	3.558	±	0.1629	0.1731	±	0.0392	0.657	±	0.03	0.891916	±	0.120267	2.03329	±	0.17153	0.853004	±	0.0674391
TCS083 PDCYli* (d20)	EcDL134e20	0.198592	±	0.0329455	0.478299	±	0.00361901	2.9022	±	0.6267	0.169	±	0.0368	0.716	±	0.008	0.982403	±	0.147153	1.72039	±	0.148851	0.84559	±	0.0182
TCS083 PDCSc1* (d40)	EcDL130e40	0.2502	±	0.0133	0.5093	±	0.0388	3.7924	±	0.004	0.1501	±	0.0002	0.7435	±	0.0085	0.8212	±	0.0449	2.3868	±	0.0092	0.9062	±	0.0109
TCS083 PDCSc5* (d40)	EcDL131e40	0.2191	±	0.0028	0.4145	±	0.0116	2.8055	±	0.3221	0.1584	±	0.0094	0.727	±	0.012	0.9425	±	0.0196	2.0777	±	0.0036	0.9353	±	0.0525
TCS083 PDCSc6* (d40)	EcDL132e40	0.2394	±	0.0091	0.6528	±	0.0521	3.5468	±	0.1933	0.1702	±	0.0267	0.716	±	0.028	1.0188	±	0.0376	2.37	±	0.0054	0.9292	±	0.0078
TCS083 PDCPpa* (d40)	EcDL133e40	0.2283	±	0.0101	0.5824	±	0.0901	3.802	±	0.3179	0.1236	±	0.0094	0.663	±	0.004	0.8177	±	0.0412	2.5185	±	0.0342	0.8429	±	0.0162
TCS083 PDCYli* (d40)	EcDL134e40	0.2005	±	0.0049	0.6451	±	0.1173	3.087	±	0.1226	0.1506	±	0.009	0.6755	±	0.0145	0.8815	±	0.1274	2.1321	±	0.1182	1.006	±	0.0228
TCS083 PDCSc1 AdhBZm	EcDL123	0.0434	±	0.0036	0.1592	±	0.0182	0.7995	±	0.0456	0.1971	±	0.0132	0.47	±	0.002	0.7324	±	0.012	1.1921	±	0.0569	0.6096	±	0.0294
TCS083 PDCSc5 AdhBZm	EcDL124	0.0368	±	0.0033	0.2576	±	0.0262	0.9522	±	0.0053	0.2491	±	0.0178	0.3397	±	0.0045	1.131	±	0.085	1.0306	±	0.0635	0.7014	±	0.0279
TCS083 PDCSc6 AdhBZm	EcDL125	0.051	±	0.0043	0.2083	±	0.0109	0.9765	±	0.053	0.1145	±	0.0068	0.5083	±	0.004	0.8017	±	0.0062	1.1596	±	0.0832	0.5551	±	0.0183
TCS083 PDCPpa AdhBZm	EcDL126	0.0499	±	0.0045	0.3668	±	0.0442	1.0922	±	0.131	0.3591	±	0.0338	0.5607	±	0.0124	2.1337	±	0.2382	0.6746	±	0.0354	0.5575	±	0.0379
TCS083 PDCYli AdhBZm	EcDL127	0.047	±	0.0003	0.4467	±	0.0041	0.832	±	0.0243	0.3711	±	0.0186	0.4831	±	0.0061	2.6313	±	0.0849	0.5306	±	0.0411	0.5595	±	0.0048
TCS083 PDCZm AdhBZm	EcDL128	0.1753	±	0.0034	1.0118	±	0.0577	2.4495	±	0.0662	0.4522	±	0.0248	1.2167	±	0.0537	3.7586	±	0.2022	0.0958	±	0.0094	0.3183	±	0.0102
TCS095 PDCZm AdhBZm	EcDL109	0.1838	±	0.009	0.9131	±	0.0159	2.3457	±	0.0227	0.4507	±	0.0038	1.3927	±	0.031	4.436	±	0.0684	0.0596	±	0.0022	0.1326	±	0.0037
TCS095 PDCPpa AdhBZm	EcDL121	0.0153	±	0.0003	0.1327	±	0.0031	0.5127	±	0.0097	0.265	±	0.0029	0.4247	±	0.0297	1.7803	±	0.0206	0.6902	±	0.0373	0.7072	±	0.0391
TCS095 PBBa_J23108PDCZm AdhBZm	EcDL110	0.0855	±	0.0007	0.3859	±	0.0388	0.8599	±	0.2848	0.3713	±	0.0405	0.3715	±	0.0488	0.5728	±	0.1343	n.a.			0.0365	±	0.01
TCS095 PBBa_J23100 PDCZm AdhBZm	EcDL111	0.1494	±	0.0128	0.9176	±	0.1755	2.4784	±	0.0689	0.381	±	0.0637	1.75	±	0.052	3.7482	±	0.2799	n.a.			0.1907	±	0.0234
TCS095 T7 PDCZm AdhBZm	EcDL112	0.1881	±	0.0079	1.435	±	0.4556	2.9079	±	0.1562	0.3795	±	0.0536	1.8433	±	0.1361	4.064	±	0.3918	n.a.			0.167	±	0.0058
